# Supplementary material for: Thickness-Dependent Photoelectrochemical Water Splitting Properties of Self-Assembled Nanostructured LaFeO3 Perovskite Thin Films
Source: MDPI journal article supplement (doi:10.3390/nano11061371), 2021-05-21
Supplement: s1 [file s1]

## Supplementary Materials

# Thickness-Dependent Photoelectrochemical Water Splitting Properties of Self-Assembled Nanostructured LaFeO<sub>3</sub> Perovskite Thin Films

Florin Andrei <sup>1,2</sup>, Valentin Ion <sup>1</sup>, Ruxandra Birjega <sup>1</sup>, Maria Dinescu <sup>1</sup>, Nicoleta Enea <sup>1,3</sup>, Dan Pantelica <sup>4</sup>, Maria Diana Mihai <sup>4</sup>, Valentin-Adrian Maraloiu <sup>5</sup>, Valentin Serban Teodorescu <sup>5,6</sup>, Ioan-Cezar Marcu <sup>2,7,\*</sup> and Nicu Doinel Scarisoreanu <sup>1,\*</sup>

<sup>1</sup> National Institute for Laser, Plasma and Radiation Physics, 077125 Magurele, Romania; florin.andrei@inflpr.ro (F.A.); valentin.ion@inflpr.ro (V.I.); ruxandra.birjega@inflpr.ro (R.B.); maria.dinescu@inflpr.ro (M.D.); nicoleta.enea@inflpr.ro (N.E.)

<sup>2</sup> Laboratory of Chemical Technology & Catalysis, Department of Organic Chemistry, Biochemistry & Catalysis, Faculty of Chemistry, University of Bucharest, Blv. Regina Elisabeta, No. 4-12, 030018 Bucharest, Romania

<sup>3</sup> Faculty of Physics, University of Bucharest, 077125 Magurele, Romania

<sup>4</sup> Horia Hulubei National Institute for R&D in Physics and Nuclear Engineering, 077125 Magurele, Romania; dpantelica@yahoo.fr (D.P.); draceamariadiana@gmail.ro (M.D.M.)

<sup>5</sup> National Institute for Material Physics, 077125 Magurele, Romania; maraloiu@infim.ro (V.-A.M.); teoval@infim.ro (V.S.T.)

<sup>6</sup> Academy of Romanian Scientists, 050094 Bucharest, Romania

<sup>7</sup> Research Center for Catalysts and Catalytic Processes, Faculty of Chemistry, University of Bucharest, Blv. Regina Elisabeta, No. 4-12, 030018 Bucharest, Romania

\* Correspondence: ioancezar.marcu@chimie.unibuc.ro (I.-C.M.); nicu.scarisoreanu@inflpr.ro (N.D.S.); Tel.: +40-21-3051464 (I.-C.M.); +40-74-3147427 (N.D.S.)

## Unbiased Hydrogen Production Measurements

The photocatalytic hydrogen production measurements of LFO/STON thin films were performed in a glass cell (total volume of ca. 35 mL) with a quartz window for irradiation. The sample was immersed in 15 mL of NaOH aqueous solution under magnetic stirring. The irradiation of the sample was realized using a laser diode emitting at 405 nm. The generated hydrogen gas was quantitatively analyzed using a Shimadzu Nexis GC-2030 gas chromatograph (GC) equipped with a ShinCarbon ST micro-packed column and a barrier ionization discharge (BID) detector. High purity helium was used as carrier gas. The gas sample was injected into the GC using a HAMILTON syringe with a volume of 250  $\mu$ L. The GC parameters used to record chromatograms were: the injector pressure, temperature and split ratio 250 kPa, 150  $^{\circ}$ C, and 1:5, respectively, the column temperature, 35  $^{\circ}$ C and the detector temperature and discharge gas flow, 280  $^{\circ}$ C and 100 mL/min, respectively.

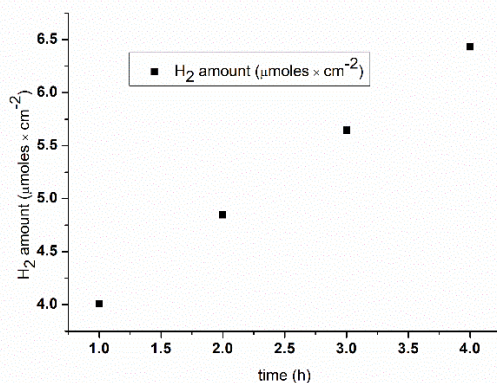

**Figure S1.** The photocatalytic hydrogen generation in time for the LFO/STON sample having 32 nm thickness.

## Optical Properties: Spectroellipsometry Data

**Table S1.** The fitting parameters used to obtain the dielectric function spectra for all analysed samples.

| Thickness (nm) | Roughness (nm) | An     | En (eV) | Br (eV) | MSE   |
|----------------|----------------|--------|---------|---------|-------|
| 14.1           | 0.3            | 1.7421 | 3.2072  | 0.9651  | 5.231 |
|                |                | 2.6678 | 4.0374  | 0.4826  |       |
|                |                | 6.3246 | 4.6299  | 1.0706  |       |
|                |                | 8.0825 | 8.6943  | 2.9356  |       |
| 21.2           | 7.4            | 1.3958 | 3.1603  | 0.7928  | 1.933 |
|                |                | 2.5416 | 4.0138  | 0.4921  |       |
|                |                | 5.3508 | 4.5435  | 0.8439  |       |
|                |                | 11.757 | 9.1872  | 3.3178  |       |
| 29.2           | 7.6            | 1.3066 | 3.0576  | 0.7310  | 1.561 |
|                |                | 3.289  | 4.1173  | 0.5497  |       |
|                |                | 4.9815 | 4.6746  | 0.9063  |       |
|                |                | 11.642 | 9.3884  | 3.327   |       |
| 31.3           | 1.2            | 0.2882 | 2.6422  | 2.269   | 1.335 |
|                |                | 1.1577 | 3.1271  | 0.7818  |       |
|                |                | 4.0399 | 4.2221  | 0.8237  |       |
|                |                | 6.8136 | 7.2933  | 3.3636  |       |
| 132.1          | 0.5            | 1.0662 | 2.9212  | 0.5608  | 2.044 |
|                |                | 4.4495 | 4.3144  | 1.09    |       |
|                |                | 4.546  | 11.99   | 9.7818  |       |
| 192.8          | 9.1            | 0.9059 | 3.0226  | 0.4734  | 2.183 |
|                |                | 4.6067 | 4.2825  | 0.6108  |       |
|                |                | 6.3301 | 8.2568  | 5.8434  |       |

## Compositional Analysis: Rutherford Backscattering Spectrometry (RBS) Analysis

**Table S2.** The cation composition and ratio for three different thicknesses LFO/STON thin films.

| Sample         | Composition          |                       | Fe/La |
|----------------|----------------------|-----------------------|-------|
| 14 nm LFO/STON | Fe                   | La                    | 1.217 |
|                | 0.28 ( $\pm 3.5\%$ ) | 0.23 ( $\pm 1\%$ )    |       |
| 29 nm LFO/STON | Fe                   | La                    | 1.051 |
|                | 0.206 ( $\pm 3\%$ )  | 0.196 ( $\pm 0.7\%$ ) |       |
| 32 nm LFO/STON | Fe                   | La                    | 0.727 |
|                | 0.163 ( $\pm 3\%$ )  | 0.224 ( $\pm 1\%$ )   |       |
